# Supplementary material for: Dual stem cell therapy from adipose tissue facilitates arteriogenesis and limb preservation in experimental critical limb ischemia via direct vascular integration
Source: Research Square preprint supplement (doi:10.21203/rs.3.rs-7690305/v1), 2025-10-30
Supplement: Supplementary file 1 [file bb75cc707bc8b1c48d700d7b.pdf]

**Supplementary Materials of**  
**“Dual stem cell therapy from adipose tissue facilitates**  
**arteriogenesis and limb preservation in experimental**  
**critical limb ischemia via direct vascular integration”**

Do Young Kim, Dae Yeon Hwang, Gabee Park, Yeon Ju Song, Youngsook Son,

Sung Vin Yim, Hyun Sook Hong

# Supplementary Fig 1

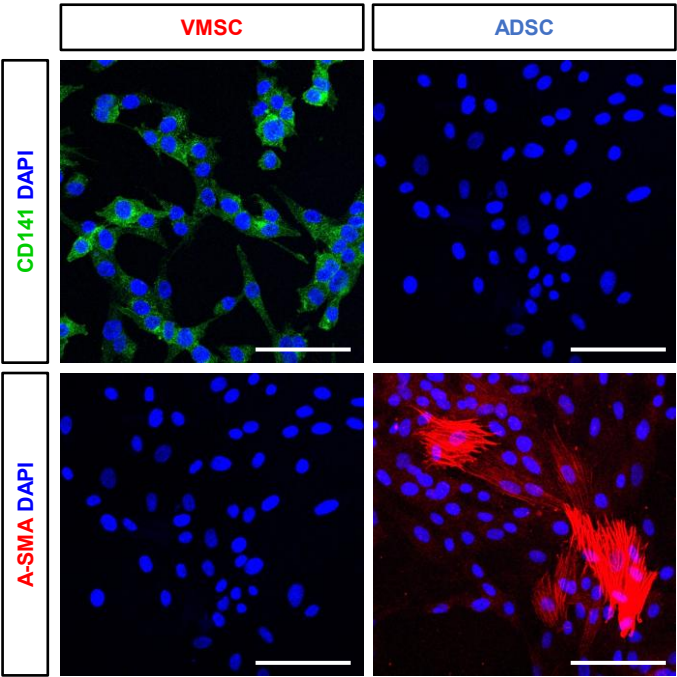

**Supplementary Fig 1. Immunofluorescence staining for CD141 and  $\alpha$ -SMA in VMSCs and ADSCs**  
VMSC and ADSC was coverslip on 24 well plate and fixed with 3.7% formalin, followed by anti-CD141 or  $\alpha$ -SMA staining. anti Scale bar:100  $\mu$ m.

# Supplementary Fig 2

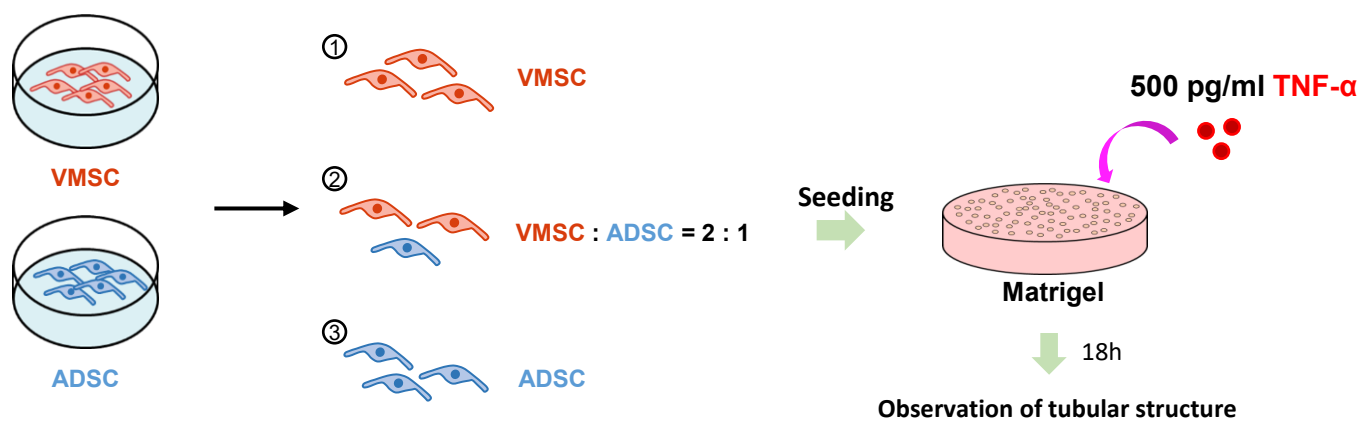

**Supplementary Fig 2. Experimental scheme of tube formation assay for assessing angiogenic capacity of VMSCs and ADSCs under the inflammatory stress**  
VMSCs, ADSCs, and combination of VMSCs and ADSCs were seeded onto Matrigel in the presence or absence of 500 pg/ml TNF- $\alpha$ . 18h later, tubular structure was comparatively observed

# Supplementary Fig 3

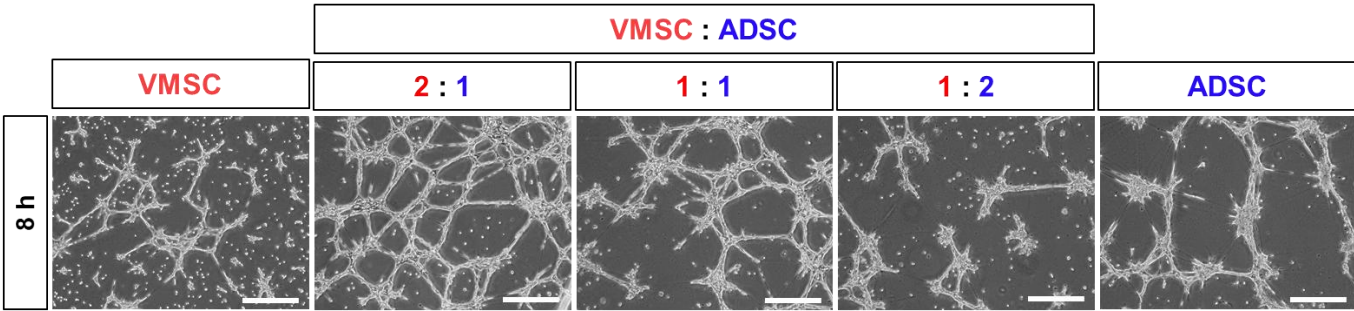

**Supplementary Fig 3. Optimization of combination ratio for VMSC and ADSC**

Representative images showing In vitro Matrigel tube formation assay on  $\mu$ -slide of VMSCs, ADSCs, and mixture of VMSCs and ADSCs. Tube formation assay was allowed for 24 h. (Total cells: 9,000 cells/well) (Scale bar: 500  $\mu$ m).(F) Tube formation of PKH-red-labeled ADSC and PKH-greed-labeled VMSC on Matrigel (Scale bar: 100  $\mu$ m).

# Supplementary Fig 4

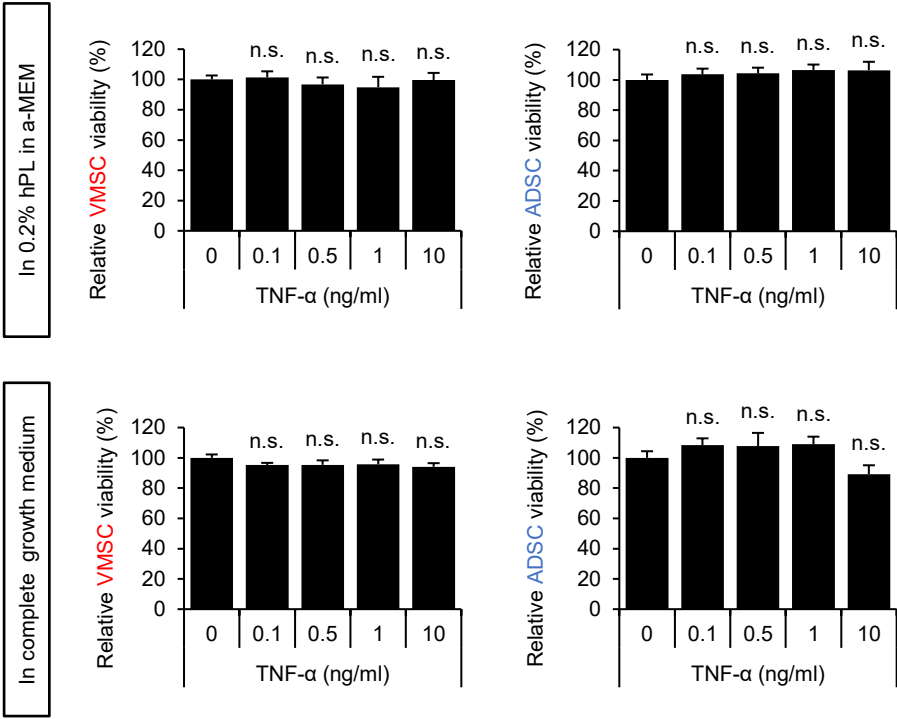

**Supplementary Fig 4. Effect of diverse concentrations of TNF-α on the viability of VMSCs and ADSCs**

VMSCs or ADSCs were treated with the indicated concentrations of TNF-α, and cell viability was measured 24 h later using the WST-1 assay. Viability is expressed as a percentage relative to the untreated control (0 ng/mL). Values are mean ± SD, One-way ANOVA test followed by Tukey’s multiple comparison test, n=5; n.s.: not significant)

# Supplementary Fig 5

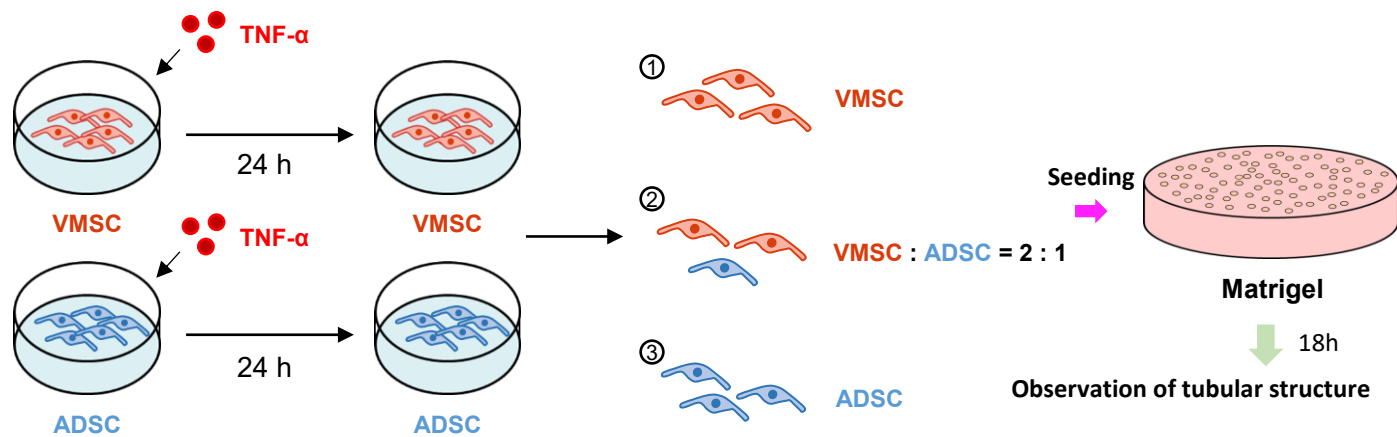

**Supplementary Fig 5. Experimental scheme of tube formation assay for evaluating angiogenic capacity of  $\text{TNF-}\alpha$  primed VMSCs and ADSCs**  
VMSCs and ADSCs were pretreated with 10 ng/mL  $\text{TNF-}\alpha$  for 24 h, followed by seeding of VMSCs, ADSCs, or VMSC–ADSC co-cultures (2:1 ratio) onto Matrigel.

## Supplementary Fig 6

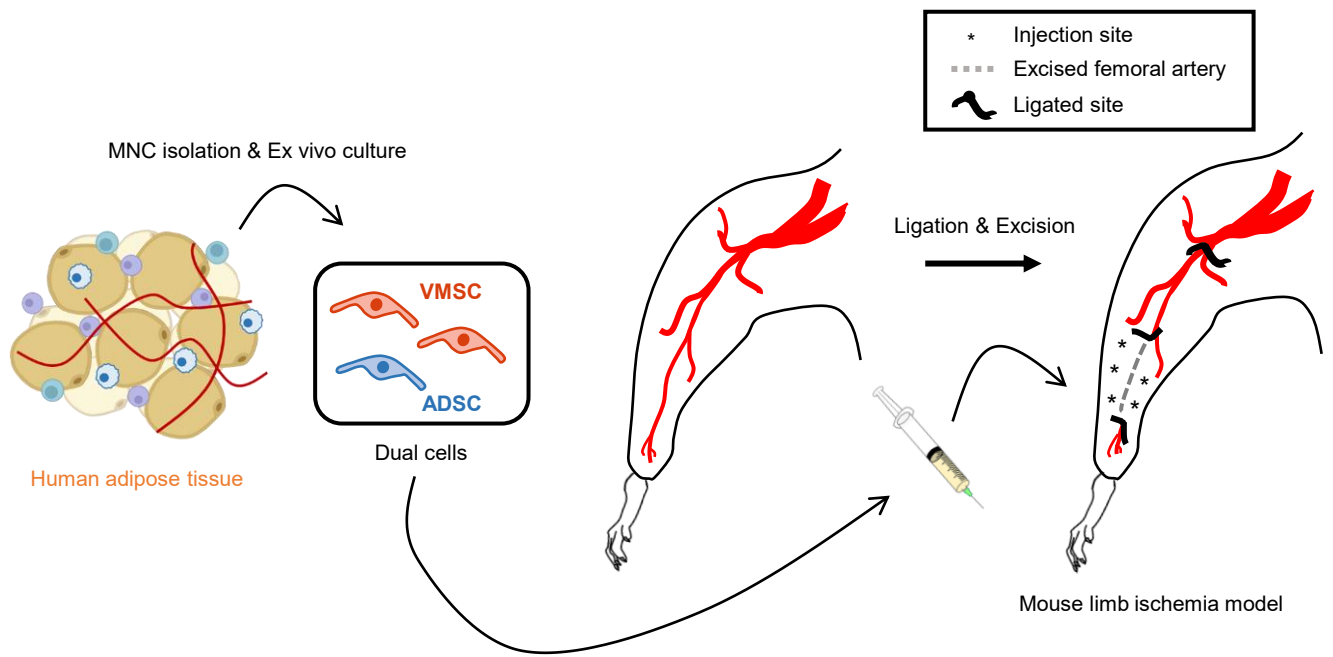

### Supplementary Fig 6. Co-transplantation of VMSCs and ADSCs at 2:1 ratio into mouse limb ischemia model

VMSCs and ADSCs were isolated from human adipose tissue and expanded in culture. A total  $2.4 \times 10^5$  cells (VMSCs:  $1.6 \times 10^5$  cells and ADSCs:  $0.8 \times 10^5$  cells) were injected into each 5 sites of legs intramuscularly.

# Supplementary Fig 7

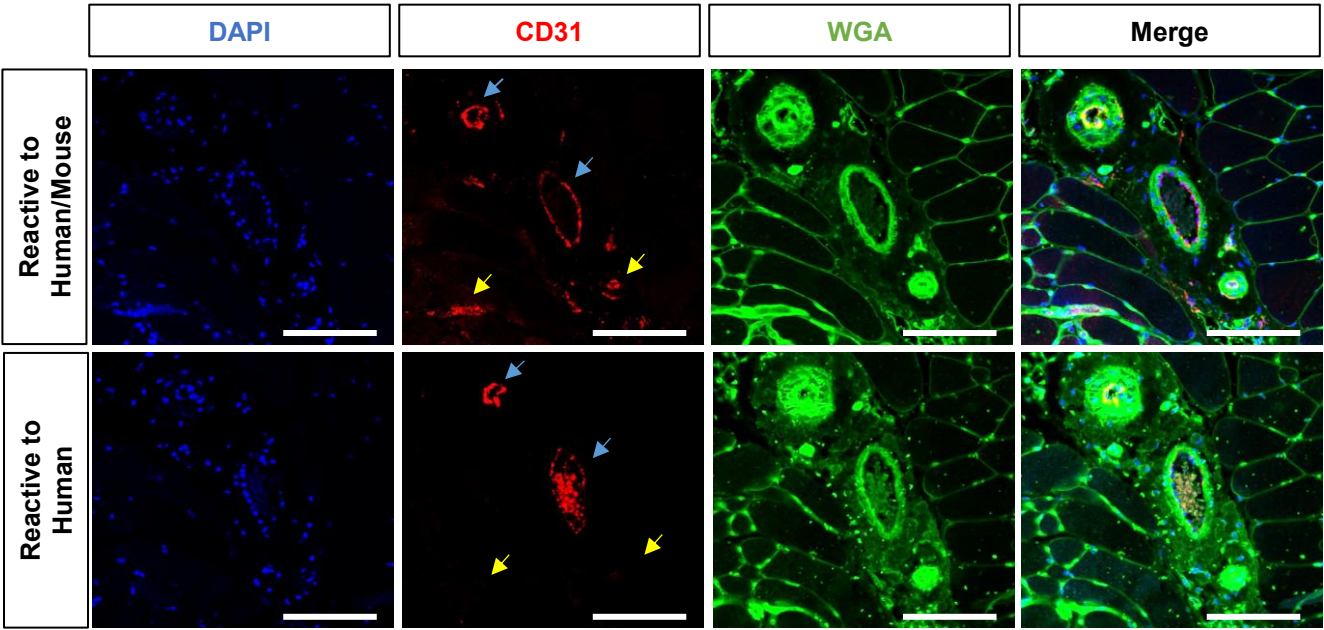

**Supplementary Fig. 7. Immunofluorescence staining with anti-human CD31 and anti-human/mouse CD31 antibodies**

Dual cells were transplanted into CLI mice, and 28 days later, tissues were isolated and fixed. Paraffin-embedded serial sections were stained to distinguish vessels derived from transplanted human cells (human CD31<sup>+</sup>) from host mouse vessels (human/mouse CD31<sup>+</sup>). Blue arrows indicate human CD31<sup>+</sup> vessels; yellow arrows indicate mouse vessels



# Supplementary Fig 8

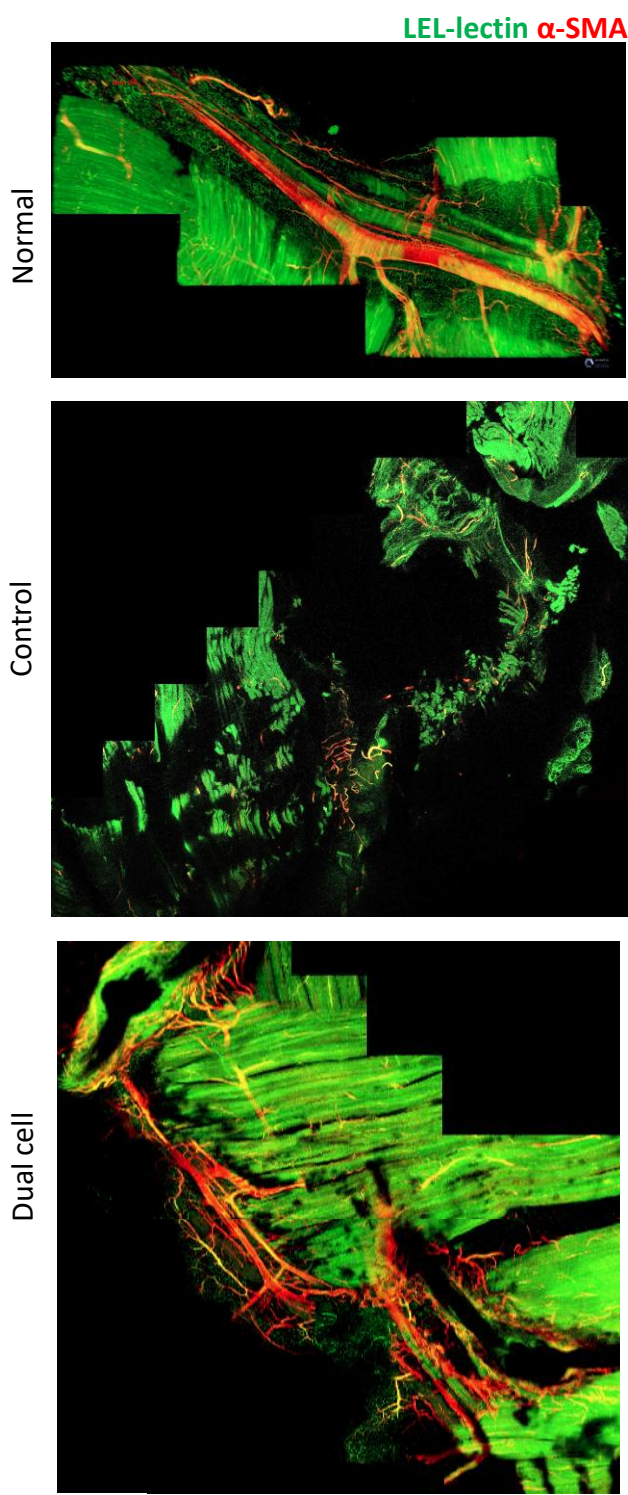

**Supplementary Fig 8. Low-magnification immunofluorescence image showing perfusable vasculature with perivascular cell coverage**

Dual cells were transplanted into CLI mice, and 28 days later, FITC-conjugated LEL-lectin was intravenously injected immediately prior to sacrifice. Tissues were then isolated and fixed. Following a tissue-clearing procedure, samples were stained with an anti- $\alpha$ -SMA antibody to visualize functional vessels with perivascular coverage.

# Supplementary Fig 9

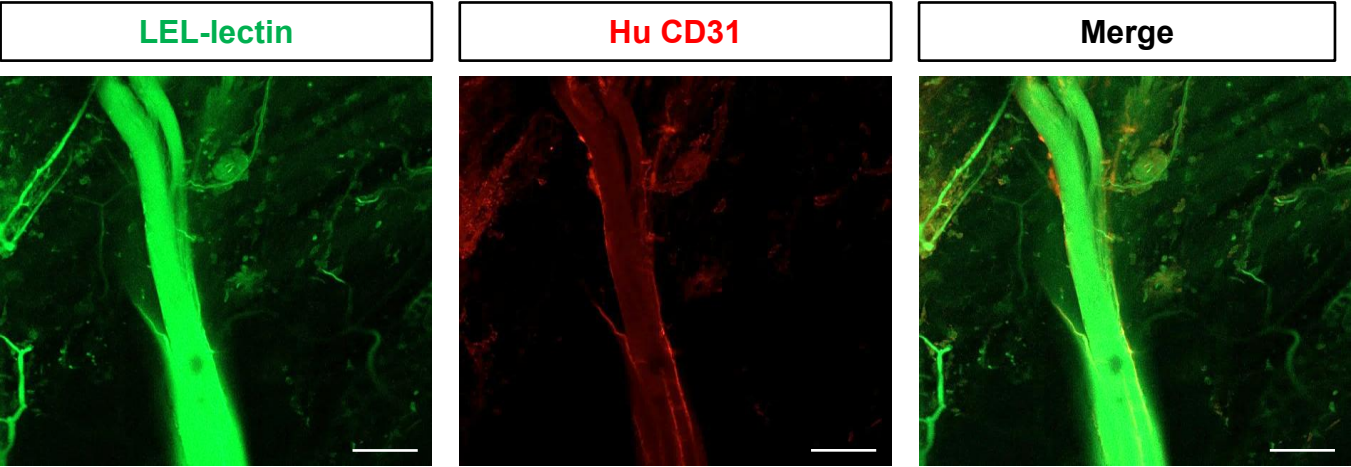

**Supplementary Fig 9. Immunofluorescence detection of human antigen in perfusable vasculature of transplanted tissue**

Dual-cell transplantation was performed in CLI mice, and 28 days post-transplantation, FITC-conjugated LEL-lectin was intravenously administered immediately before sacrifice. Tissues were subsequently harvested and fixed. After tissue clearing, samples were immunostained with an anti-human CD31 antibody, followed by Alexa Fluor 568-conjugated secondary antibodies to visualize human cell-integrated functional vessels with perivascular coverage.

# Supplementary Fig 10

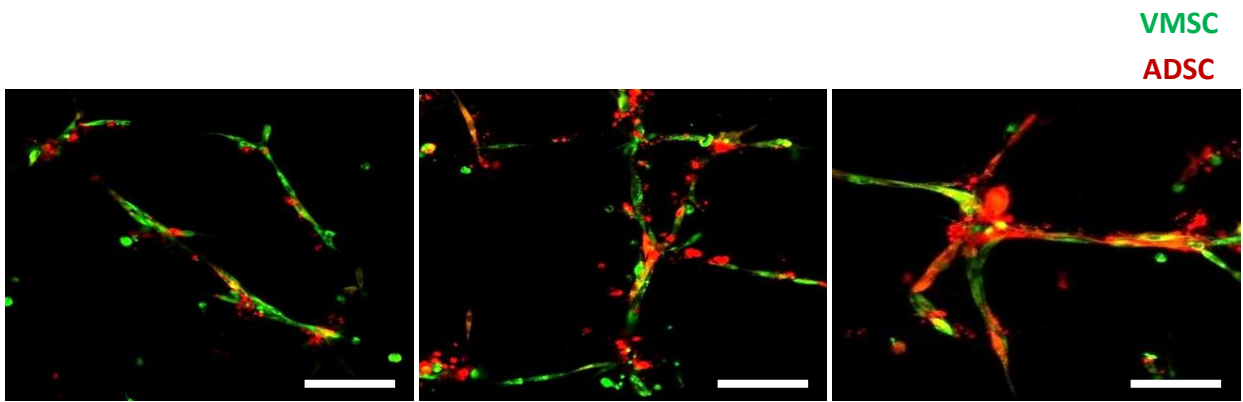

**Supplementary Fig 10. Tube formation with VMSC and ADSC in vitro**  
PKH-red-labeled ADSC and PKH-greed-labeled VMSC was seeded on Matrigel-coated cover slip and tube formation process was observed (Scale bar: 100  $\mu$ m).

A

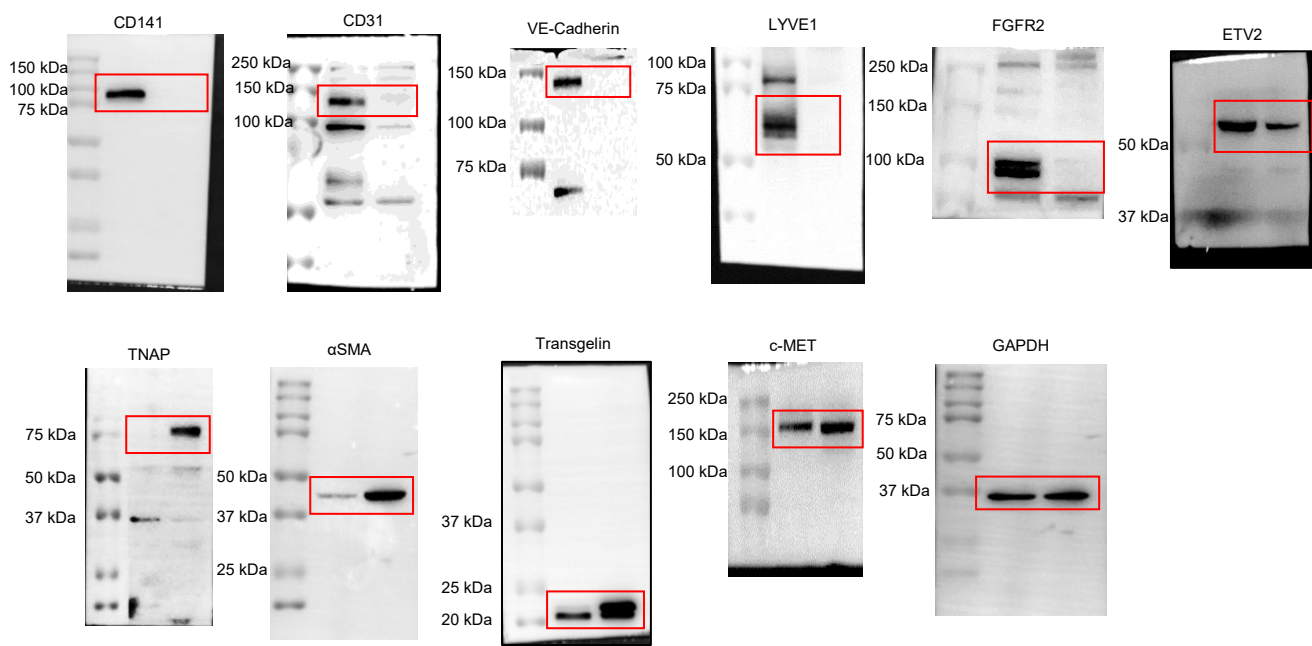

B

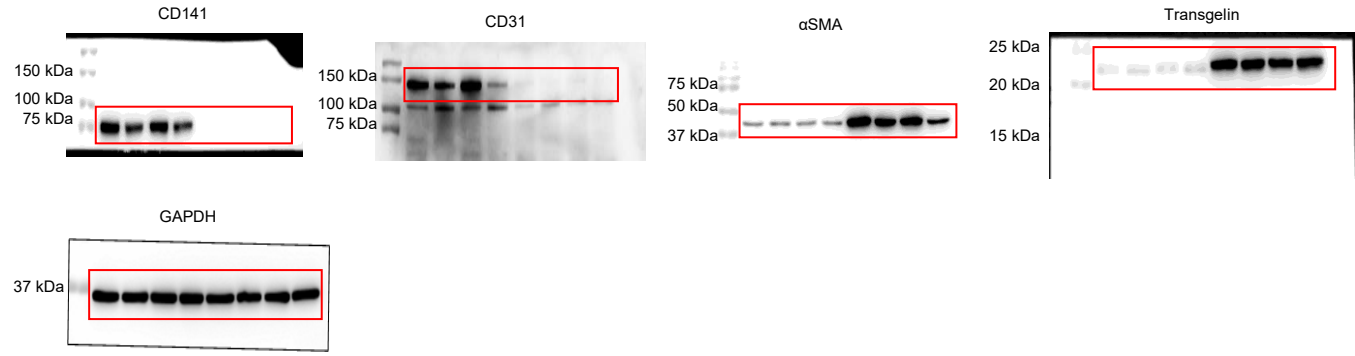

**Supplementary Fig 11. Un-cropped blots for Western blot data**  
(A) Whole blot for Figure 2A. (B) Whole blot for Figure 3A.
